# Supplementary material
Source: PubMed Central journal article supplement (PMC4924429)
Supplement: Supplementary_Material_50.pdf [file Supplementary_Material_50.pdf]

**Table 4bis:** Univariate analysis of patient's and procedural's characteristics associated with stent migration

|                                       |                       | No migration      | Migration          | p-value      | OR          | 95% IC |       |
|---------------------------------------|-----------------------|-------------------|--------------------|--------------|-------------|--------|-------|
| Age                                   |                       | 53.7 ( $\pm$ 8.1) | 54.1 ( $\pm$ 13.3) | 0.872        | 1.003       | 0.956  | 1.053 |
| Sex                                   | Male                  | 50 (79.4%)        | 12 (52.2%)         | <b>0.013</b> | 1 reference |        |       |
|                                       | Female                | 13 (20.6%)        | 11 (47.8%)         |              | 3.44        | 1.26   | 9.36  |
| Etiology                              | Liver transplantation | 21 (33.3%)        | 13 (56.5%)         | <b>0.006</b> | 4.95        |        |       |
|                                       | Chronic pancreatitis  | 35 (55.6%)        | 4 (17.4%)          |              | 1 reference |        |       |
|                                       | Post-surgical         | 7 (11.1%)         | 6 (26.1%)          |              | 6,84        | 1.62   | 28.77 |
| N° previous Endoscopic treatments     |                       | 0.6 ( $\pm$ 0.8)  | 1.2 ( $\pm$ 1.5)   | <b>0.026</b> | 1.587       | 1.022  | 2.462 |
| Dilation in a previous procedure      | No                    | 51 (86.4%)        | 12 (63.2%)         | <b>0.025</b> | 1 reference |        |       |
|                                       | Yes                   | 8 (13.6%)         | 7 (36.8%)          |              | 3.64        | 1.14   | 11.6  |
| Dilatation preceding FCSEMS placement | No                    | 42 (71.2%)        | 13 (59.1%)         | 0.3          | 1 reference |        |       |
|                                       | Yes                   | 17 (28.8%)        | 9 (40.9%)          |              | 1,71        | 0.63   | 4.64  |
| Dilation diameter                     | 6mm                   | 4 (33.3%)         | 1 (16.7%)          | 0.615        | 1 reference |        |       |
|                                       | 8mm                   | 8 (66.7%)         | 5 (83.3%)          |              | 1,94        | 0.23   | 16.44 |
| Stricture length                      |                       | 1.5 ( $\pm$ 1.0)  | 1.0 ( $\pm$ 0.8)   | 0.053        | 0.544       | 0.276  | 1.073 |
| FCSEMS length                         | 40x10mm               | 19 (33.9%)        | 2 (9.5%)           | 0.087        | 1 reference |        |       |
|                                       | 60x10mm               | 13 (23.2%)        | 8 (38.1%)          |              | 4.91        | 1.02   | 23.64 |
|                                       | 80x10mm               | 24 (42.9%)        | 11 (52.4%)         |              | 3.66        | 0.82   | 16.27 |

**Table 5 bis:** Univariate analysis of patients' or procedure's characteristics associated with early success

|                                         |                       | Early success | Persistent stricture | p-value           | OR                 | CI95% |       |
|-----------------------------------------|-----------------------|---------------|----------------------|-------------------|--------------------|-------|-------|
| Age                                     |                       | 53.4 (±9.3)   | 58.4 (±11.8)         | 0.113             | 1.058              | 0.984 | 1.138 |
| Sex                                     | Male                  | 55 (75.3%)    | 5 (45.5%)            | <b>0.04</b>       | 1 <i>reference</i> |       |       |
|                                         | Female                | 18 (24.7%)    | 6 (54.5%)            |                   | 3.55               | 1.01  | 12.39 |
| Etiology                                | Liver transplantation | 29 (39.7%)    | 4 (36.4%)            | <b>0.01</b>       | 2.23               |       |       |
|                                         | Chronic pancreatitis  | 36 (49.3%)    | 2 (18.2%)            |                   | 1 <i>reference</i> |       |       |
|                                         | Post surgical         | 8 (11.0%)     | 5 (45.5%)            |                   | 9.45               | 1.78  | 50.23 |
| Number of previous endoscopic treatment |                       | 0.7 (±0.9)    | 1.4 (±1.9)           | 0.343             | 1.529              | 0.977 | 2.394 |
| Dilation in a previous procedure        | No                    | 54 (83.1%)    | 7 (63.6%)            | 0.134             | 1 <i>reference</i> |       |       |
|                                         | Yes                   | 11 (16.9%)    | 4 (36.4%)            |                   | 2.84               | 0.75  | 10.76 |
| Dilatation preceding FCSEMS placement   | No                    | 47 (69.1%)    | 6 (54.5%)            | 0.34              | 1 <i>reference</i> |       |       |
|                                         | Yes                   | 21 (30.9%)    | 5 (45.5%)            |                   | 1.87               | 0.54  | 6.49  |
| Dilation diameter (mm)                  | 6                     | 5 (33.3%)     | 0 (0.0%)             | 0.522             | 1 <i>reference</i> |       |       |
|                                         | 8                     | 10 (66.7%)    | 3 (100.0%)           |                   | 3.67               | 0.16  | 84.51 |
| Stricture length                        |                       | 1.4 (±0.9)    | 1.5 (±1.3)           | 0.981             | 1.171              | 0.622 | 2.204 |
| FCSEMS length                           | 40x10                 | 20 (30.3%)    | 1 (11.1%)            | 0.376             | 1 <i>reference</i> |       |       |
|                                         | 60x10                 | 17 (25.8%)    | 2 (22.2%)            |                   | 1.95               | 0.23  | 16.3  |
|                                         | 80x10                 | 29 (43.9%)    | 6 (66.7%)            |                   | 3.01               | 0.47  | 19.4  |
| Migration                               | No                    | 62 (84.9%)    | 1 (9.1%)             | <b>&lt;0.0001</b> | 1 <i>reference</i> |       |       |
|                                         | Yes                   | 11 (15.1%)    | 10 (90.9%)           |                   | 38.04348           | 6.147 | 235.4 |

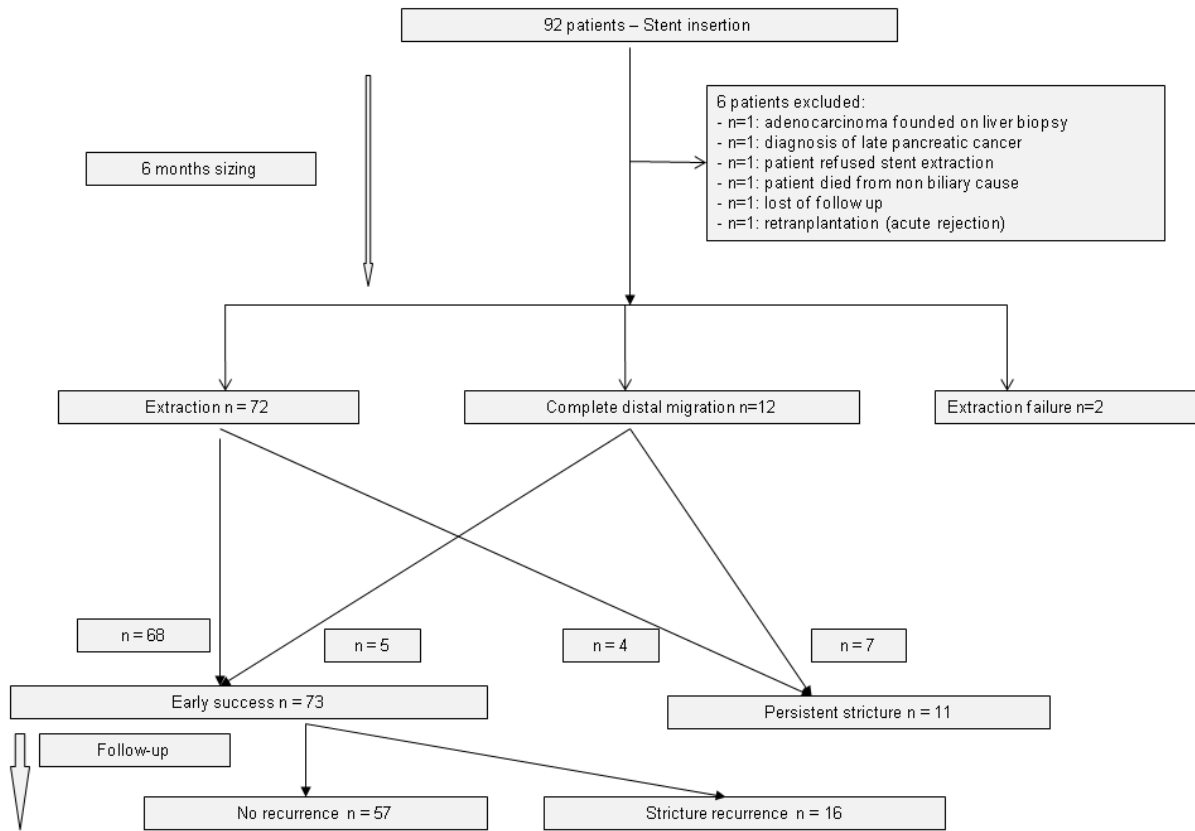

Flow chart summarizing overall outcomes
